# Supplementary material for: Persistence of Norovirus GII Genome in Drinking Water and Wastewater at Different Temperatures
Source: PubMed Central journal article supplement (PMC5750572; doi:10.3390/pathogens6040048), 2017-10-11
Supplement: pathogens-06-00048-s001.pdf [file pathogens-06-00048-s001.pdf]

Supplementary Material

**Table S1.** Literature survey of decay rates of norovirus genome in liquid.

| <b>Matrix</b> | <b>Temperature</b> | <b>Log<sub>10</sub>/day</b> | <b>T90</b> | <b>T99.99</b> | <b>Reference</b> |
|---------------|--------------------|-----------------------------|------------|---------------|------------------|
| Groundwater   | 4°C                | 0.01±0.05                   | 100*       | 400*          | [16]             |
| Groundwater   | 25°C               | 0.01±0.05                   | 100*       | 400*          | [16]             |
| Surface water | 4°C                | 0.04±0.02                   | 25*        | 100*          | [16]             |
| Surface water | 25°C               | 0.08±0.02                   | 12.5*      | 50*           | [16]             |
| PBS           | 4°C                | 0.0086**                    | 116**      | 465**         | [21]             |
| PBS           | RT                 | 0.0286**                    | 35**       | 140**         | [21]             |
| PBS           | 37°C               | 0.1814**                    | 5.5**      | 22**          | [21]             |
| Wastewater    | 4°C                | 0.0087                      | 114.9      | 460*          | [18]             |
| Wastewater    | 20°C               | 0.0445                      | 22.5       | 90*           | [18]             |

\*Calculated from log<sub>10</sub> day<sup>-1</sup> reduction values reported in the paper; \*\*Calculated from the slope values reported in the paper
